# Supplementary material
Source: PubMed Central journal article supplement (PMC8221943)
Supplement: boe-12-6-3571-s001.pdf [file boe-12-6-3571-s001.pdf]

## Choosing a model for laser speckle contrast imaging: supplement

CHANG LIU,<sup>1,2</sup>  KIVILCIM KILIÇ,<sup>3</sup> SEFIK EVREN ERDENER,<sup>3,4</sup>  
DAVID A. BOAS,<sup>1,3</sup> AND DMITRY D. POSTNOV<sup>3,5,\*</sup> 

<sup>1</sup>Department of Biomedical Engineering, Boston University, Massachusetts 02215, USA

<sup>2</sup>Department of Bioengineering, Northeastern University, Massachusetts 02115, USA

<sup>3</sup>Neurophotonics Center, Boston University, Massachusetts 02215, USA

<sup>4</sup>Institute of Neurological Sciences and Psychiatry, Hacettepe University, Ankara, Turkey

<sup>5</sup>Department of Biomedical Sciences, Copenhagen University, Copenhagen, Denmark

\*[dpostnov@sund.ku.dk](mailto:dpostnov@sund.ku.dk)

---

This supplement published with The Optical Society on 21 May 2021 by The Authors under the terms of the [Creative Commons Attribution 4.0 License](https://creativecommons.org/licenses/by/4.0/) in the format provided by the authors and unedited. Further distribution of this work must maintain attribution to the author(s) and the published article's title, journal citation, and DOI.

Supplement DOI: <https://doi.org/10.6084/m9.figshare.14609976>

Parent Article DOI: <https://doi.org/10.1364/BOE.426521>

# Choosing a model for laser speckle contrast imaging: supplemental document

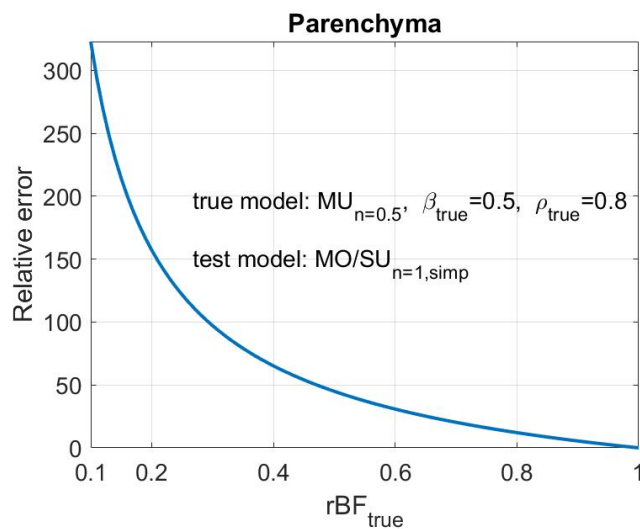

**Fig. S1.** Relative error caused by a typical combination of wrong assumptions when measuring blood flow in the parenchyma. Ground truth model was set to  $MU_{n=0.5}$  with  $\tau_c = 1ms$ ,  $T = 5ms$ ,  $\beta = 0.5$ ,  $\rho = 0.8$ , while the conventionally used  $MO/SU_{n=1,simp}$  was tested.

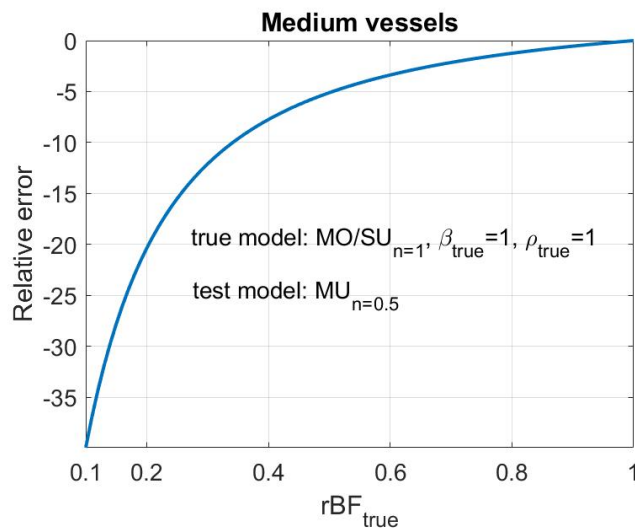

**Fig. S2.** Relative error caused by using  $MU_{n=0.5}$  model in medium-sized vessels. Ground truth model was set to  $MO/SU_{n=1}$ , with  $T = 5ms$ ,  $\tau_c = 0.2ms$ ,  $\beta = 1$ ,  $\rho = 1$ .

**Derivation of Eq. 12**

Field autocorrelation function for multiple scattering unordered motion regime is given by:

$$g_1(\tau) = \exp\left(-\sqrt{\tau/\tau_c}\right) \quad (S1)$$

With Eq. 10,  $g_2$  becomes:

$$g_2 = 1 + \beta \left[ \rho^2 \exp(-\sqrt{\tau/\tau_c}) + 2\rho(1-\rho) |\exp(-\sqrt{\tau/\tau_c})| + (1-\rho^2) \right] \quad (S2)$$

Substitute the new  $g_2$  into Eq. 3 to compute the autocovariance  $C_t(\tau)$ :

$$C_t(\tau) = \beta \left[ \rho^2 \exp(-\sqrt{\tau/\tau_c})^2 + 2\rho(1-\rho) \exp(-\sqrt{\tau/\tau_c}) + (1-\rho^2) \right] \langle I \rangle_t^2 \quad (S3)$$

From Eq. 1 the contrast is derived as:

$$K_s^2 = \frac{2\beta}{T} \int_0^T \left(1 - \frac{\tau}{T}\right) \left\{ \rho^2 \exp(-\sqrt{\tau/\tau_c})^2 + 2\rho(1-\rho) \exp(-\sqrt{\tau/\tau_c}) + (1-\rho^2) \right\} d\tau \quad (S4)$$

Compute the definite integral to obtain Eq.12 .

**Derivation of Eq. 13**

For single scattering and ordered motion regime, the proper model of autocorrelation function is

$$g_1(\tau) = \exp\left(-(\tau/\tau_c)^2\right) \quad (S5)$$

Substitute Eq. S5 in Eq. 10,  $g_2$  becomes:

$$g_2 = 1 + \beta \left\{ \rho^2 \exp\left(-(\tau/\tau_c)^2\right)^2 + 2\rho(1-\rho) \exp\left(-(\tau/\tau_c)^2\right) + (1-\rho^2) \right\} \quad (S6)$$

The autocovariance function  $C_t(\tau)$  in this case becomes:

$$C_t(\tau) = \beta \left\{ \rho^2 \exp\left(-(\tau/\tau_c)^2\right)^2 + 2\rho(1-\rho) \exp\left(-(\tau/\tau_c)^2\right) + (1-\rho^2) \right\} \langle I_t \rangle^2 \quad (S7)$$

Substitute Eq. S7 into Eq. 1, the contrast equation is:

$$K_s^2 = \frac{2\beta}{T} \int_0^T \left(1 - \frac{\tau}{T}\right) \left\{ \rho^2 \exp\left(-(\tau/\tau_c)^2\right)^2 + 2\rho(1-\rho) \exp\left(-(\tau/\tau_c)^2\right) + (1-\rho^2) \right\} d\tau \quad (S8)$$

Compute the definite integral to obtain Eq.13.
